# Supplementary material
Source: PubMed Central journal article supplement (PMC9881275)
Supplement: 12888_2023_4551_MOESM2_ESM.pdf [file 12888_2023_4551_MOESM2_ESM.pdf]

## Supplementary Material 2

### **Gaze-based Attention Refocusing Training in Virtual Reality for Adult Attention-Deficit/Hyperactivity Disorder**

Benjamin Selaskowski, Laura Marie Asché, Annika Wiebe, Kyra Kannen, Behrem Aslan, Thiago Morano Gerding, Dario Sanchez, Ulrich Ettinger, Markus Kölle, Silke Lux, Alexandra Philipsen & Niclas Braun

Supplementary Table 1: Results of mixed  $2 \times 3 \times 2$  ANOVAs on CPT parameters

Supplementary Table 2: Results of Group  $\times$  Block mixed ANOVAs ( $2 \times 3$ ) on gaze parameters and Group  $\times$  Block  $\times$  Phase mixed ANOVAs ( $2 \times 3 \times 2$ ) on saccade parameters

Supplementary Table 3: Results of mixed  $2 \times 3 \times 2$  ANOVAs on EEG parameters

Supplementary Table 4: Results of mixed  $2 \times 3 \times 2$  ANOVA on actigraphy parameter

Supplementary Table 5: Results of mixed  $2 \times 3$  ANOVAs on experience sampling parameters

**Supplementary Table 1. Results of separate Group  $\times$  Block  $\times$  Phase mixed ANOVAs ( $2 \times 3 \times 2$ ) on Commission Errors, Omission Errors and Reaction Times of the CPT.**

| Condition                                | df          | F     | <i>p</i> | $\eta_p^2$ |
|------------------------------------------|-------------|-------|----------|------------|
| <b><i>Commission Errors</i></b>          |             |       |          |            |
| Block (GG)                               | 1.04, 35.43 | 1.068 | .312     | .030       |
| Block $\times$ Group (GG)                | 1.04, 35.43 | 0.835 | .372     | .024       |
| Phase                                    | 1, 34       | 3.741 | .061     | .099       |
| Phase $\times$ Group                     | 1, 34       | 0.443 | .510     | .013       |
| Block $\times$ Phase                     | 2, 68       | 0.214 | .808     | .006       |
| Block $\times$ Phase $\times$ Group      | 2, 68       | 1.088 | .343     | .031       |
| Group                                    | 1, 34       | 3.057 | .089     | .082       |
| <b><i>Omission Errors</i></b>            |             |       |          |            |
| Block (GG)                               | 1.28, 43.42 | 0.466 | .545     | .014       |
| Block $\times$ Group (GG)                | 1.28, 43.42 | 1.197 | .293     | .034       |
| Phase                                    | 1, 34       | 9.350 | .004     | .216       |
| Phase $\times$ Group                     | 1, 34       | 3.447 | .072     | .092       |
| Block $\times$ Phase (HF)                | 1.85, 62.82 | 0.338 | .697     | .010       |
| Block $\times$ Phase $\times$ Group (HF) | 1.85, 62.82 | 0.394 | .659     | .011       |
| Group                                    | 1, 34       | 5.565 | .024     | .141       |
| <b><i>Reaction times</i></b>             |             |       |          |            |
| Block                                    | 2, 68       | 2.616 | .080     | .071       |
| Block $\times$ Group                     | 2, 68       | 0.018 | .982     | .001       |
| Phase                                    | 1, 34       | 0.422 | .520     | .012       |
| Phase $\times$ Group                     | 1, 34       | 2.258 | .142     | .062       |
| Block $\times$ Phase                     | 2, 68       | 0.100 | .905     | .003       |
| Block $\times$ Phase $\times$ Group      | 2, 68       | 0.130 | .878     | .004       |
| Group                                    | 1, 34       | 4.372 | .044     | .114       |

*Note.* CPT: Continuous Performance Task, GG: Greenhouse-Geisser adjusted, HF: Huynh-Feldt adjusted.

**Supplementary Table 2. Results of separate Group × Block mixed ANOVAs (2 × 3) on Gaze Parameters and Group × Block × Phase mixed ANOVAs (2 × 3 × 2) on Saccade Parameters.**

| <b>Condition</b>                             | <b>df</b>   | <b>F</b> | <b>p</b> | <b><math>\eta_p^2</math></b> |
|----------------------------------------------|-------------|----------|----------|------------------------------|
| <b><i>Distractibility score</i></b>          |             |          |          |                              |
| Block (HF)                                   | 1.71, 58.17 | 0.193    | .791     | .006                         |
| Block × Group (HF)                           | 1.71, 58.17 | 0.228    | .763     | .007                         |
| Group                                        | 1, 34       | 3.676    | .064     | .098                         |
| <b><i>Relative canvas gaze time</i></b>      |             |          |          |                              |
| Block                                        | 2, 68       | 0.107    | .899     | .003                         |
| Block × Group                                | 2, 68       | 0.655    | .523     | .019                         |
| Group                                        | 1, 34       | 3.483    | .071     | .093                         |
| <b><i>Relative distractors gaze time</i></b> |             |          |          |                              |
| Block (HF)                                   | 1.83, 62.04 | 0.734    | .472     | .021                         |
| Block × Group (HF)                           | 1.83, 62.04 | 0.574    | .551     | .017                         |
| Group                                        | 1, 34       | 9.404    | .004     | .217                         |
| <b><i>Relative gaze wandering time</i></b>   |             |          |          |                              |
| Block                                        | 2, 68       | 0.195    | .823     | .006                         |
| Block × Group                                | 2, 68       | 0.540    | .585     | .016                         |
| Group                                        | 1, 34       | 2.577    | .118     | .070                         |
| <b><i>Average saccade durations</i></b>      |             |          |          |                              |
| Block                                        | 2, 68       | 1.439    | .244     | .041                         |
| Block × Group                                | 2, 68       | 1.503    | .230     | .042                         |
| Phase                                        | 1, 34       | 11.733   | .002     | .257                         |
| Phase × Group                                | 1, 34       | 0.551    | .463     | .016                         |
| Block × Phase (HF)                           | 1.84, 62.69 | 0.881    | .412     | .025                         |
| Block × Phase × Group (HF)                   | 1.84, 62.69 | 0.386    | .665     | .011                         |
| Group                                        | 1, 34       | 3.897    | .057     | .103                         |
| <b><i>Number of saccades</i></b>             |             |          |          |                              |
| Block                                        | 2, 68       | 1.919    | .155     | .053                         |
| Block × Group                                | 2, 68       | 0.159    | .853     | .005                         |
| Phase                                        | 1, 34       | 13.870   | .001     | .290                         |
| Phase × Group                                | 1, 34       | 2.085    | .158     | .058                         |
| Block × Phase                                | 2, 68       | 0.023    | .977     | .001                         |
| Block × Phase × Group                        | 2, 68       | 0.903    | .410     | .026                         |
| Group                                        | 1, 34       | 4.897    | .034     | .126                         |

Note. HF: Huynh-Feldt adjusted.

**Supplementary Table 3. Results of separate Group  $\times$  Block  $\times$  Phase mixed ANOVAs (2  $\times$  3  $\times$  2) on the EEG Theta/Beta Ratio.**

| <b>Condition</b>                    | <b>df</b> | <b>F</b> | <b><i>p</i></b> | <b><math>\eta_p^2</math></b> |
|-------------------------------------|-----------|----------|-----------------|------------------------------|
| <i>Theta/Beta ratio</i>             |           |          |                 |                              |
| Block                               | 2, 68     | 0.752    | .475            | .022                         |
| Block $\times$ Group                | 2, 68     | 2.071    | .134            | .057                         |
| Phase                               | 1, 34     | 18.015   | < .001          | .346                         |
| Phase $\times$ Group                | 1, 34     | 3.408    | .074            | .091                         |
| Block $\times$ Phase                | 2, 68     | 0.131    | .877            | .004                         |
| Block $\times$ Phase $\times$ Group | 2, 68     | 0.463    | .632            | .013                         |
| Group                               | 1, 34     | 0.253    | .618            | .007                         |

**Supplementary Table 4. Results of the Group × Block × Phase mixed ANOVA (2 × 3 × 2) on Head Movements.**

| Condition                  | df          | F      | <i>p</i> | $\eta_p^2$ |
|----------------------------|-------------|--------|----------|------------|
| <i>Head movements</i>      |             |        |          |            |
| Block                      | 2, 68       | 3.582  | .033     | .095       |
| Block × Group              | 2, 68       | 1.449  | .242     | .041       |
| Phase (HF)                 | 1, 34       | 0.039  | .845     | .001       |
| Phase × Group (HF)         | 1, 34       | 0.738  | .396     | .021       |
| Block × Phase (HF)         | 1.82, 61.79 | 0.101  | .887     | .003       |
| Block × Phase × Group (HF) | 1.82, 61.79 | 0.540  | .569     | .016       |
| Group                      | 1, 34       | 16.060 | < .001   | .321       |

*Note.* HF: Huynh-Feldt adjusted.

**Supplementary Table 5. Results of separate Group  $\times$  Block mixed ANOVAs (2  $\times$  3) on Parameters of Experience Sampling.**

| Condition                   | df    | F      | <i>p</i> | $\eta_p^2$ |
|-----------------------------|-------|--------|----------|------------|
| <b><i>Inattention</i></b>   |       |        |          |            |
| Block                       | 2, 68 | 0.464  | .631     | .013       |
| Block $\times$ Group        | 2, 68 | 0.250  | .780     | .007       |
| Group                       | 1, 34 | 19.574 | < .001   | .365       |
| <b><i>Hyperactivity</i></b> |       |        |          |            |
| Block                       | 2, 68 | 0.359  | .700     | .010       |
| Block $\times$ Group        | 2, 68 | 1.053  | .354     | .030       |
| Group                       | 1, 34 | 16.958 | < .001   | .333       |
| <b><i>Impulsivity</i></b>   |       |        |          |            |
| Block                       | 2, 68 | 0.742  | .480     | .021       |
| Block $\times$ Group        | 2, 68 | 0.673  | .513     | .019       |
| Group                       | 1, 34 | 8.764  | .006     | .205       |
